# Supplementary material for: Synthesis of a new Ag+-decorated Prussian blue analog with high peroxidase-like activity and its application in measuring the content of the antioxidant substances in Lycium ruthenicum Murr.
Source: Royal Society of Chemistry journal article supplement (doi:10.1039/d0ra10396a), 2021-01-01
Supplement: d0ra10396a1.pdf [file d0ra10396a1.pdf]

1 **Supporting information**  
2 **Synthesis of a new Ag<sup>+</sup>-decorated Prussian blue analog with high**  
3 **peroxidase-like activity and its application in measuring the content**  
4 **of the antioxidant substances in *Lycium ruthenicum* Murr.**

5 Linqi Cheng<sup>† a</sup>, Haoxue Ding<sup>† a</sup>, Chunying Wu<sup>a</sup>, Shuyu Wang<sup>a</sup>, Xueyan Zhan<sup>\*a</sup>

6 <sup>†</sup>These authors are contributed equally to this work.

7 <sup>a</sup> *Beijing University of Chinese Medicine School of Chinese Materia Medica*

8 \* Corresponding author. Tel & Fax: +86-010-84738619; +86 010 84738621. E-mail:

9 snowzhan@bucm.edu.cn

10 \* Corresponding author

11 **Table of contents**

12 **Experimental Section.**

13 **Figure S1.** Color changes in the solution during the synthesis of Ag-PBA.

14 **Figure S2.** Photographs of Ag-PBA.

15 **Figure S3.** Images of the Tyndall effect of the solution (a) in a bright environment (b)  
16 in the dark.

17 **Figure S4.** EDS spectrum of Ag-PBA.

18 **Figure S5.** EDS spectrum of PBA.

19 **Table S1.** Elemental composition of PBA from the EDS spectrum

20 **Table S2.** Elemental composition of Ag-PBA from the EDS spectrum

21 **Figure S6.** XRD patterns of Ag-PBA and PBA.

22 **Table S3.** Absorbance of the sample solutions measured by the Ag-PBA method and  
23 the DPPH method

24 **Figure S7.** EPR spectrum of the Ag-PBA-H<sub>2</sub>O<sub>2</sub>-TMB system.

25 **Figure S8.** Antioxidant activity of anthocyanidins measured by the DPPH method (a)  
26 and the Ag-PBA method (b).

27

## 28 **Experimental Section.**

### 29 **Chemicals and materials**

30 Cu(CH<sub>3</sub>COO)<sub>2</sub>, poly(vinylpyrrolidone) (PVP, K29–32), ethanol, ethylene glycol,  
31 AgNO<sub>3</sub>, FeSO<sub>4</sub>·7H<sub>2</sub>O, KOH, KH<sub>2</sub>PO<sub>4</sub>, 3,3',5,5'-tetramethylbenzidine (TMB), and  
32 dimethyl sulfoxide (DMSO) were obtained from International Aladdin Reagent Inc.  
33 (Shanghai, China). C<sub>6</sub>H<sub>5</sub>Na<sub>3</sub>O<sub>7</sub>·2H<sub>2</sub>O (TSCD, trisodium citrate dihydrate),  
34 CoCl<sub>6</sub>·2H<sub>2</sub>O, K<sub>3</sub>[Fe(CN)<sub>6</sub>], and DPPH were purchased from Sinopharm Chemical  
35 Reagent Beijing Co. Ltd. (Beijing, China). H<sub>2</sub>O<sub>2</sub> solution (30%) was purchased from  
36 Foshan Yuhua instrument technology Co. Ltd. (Guangzhou, China). Ascorbic acid  
37 (AA) was purchased from Alfa Aesar Chemical Co. Ltd. (China). K<sub>2</sub>CrO<sub>4</sub> was  
38 purchased from Shanghai Macklin Biochemical Co. Ltd. (China). The clean, dry fruit  
39 of *Lycium ruthenicum* Murr. was obtained from Xingjiang, China.

### 40 **Instrumentation**

41 Transmission electron microscopy (TEM) images of Ag-PBA were obtained by a  
42 transmission electron microscope (FEITecni G2 20 S-TWIN) operating at an  
43 accelerating voltage of 200 kV. The absorbance was measured on a 96-well plate

44 using a Molecular Devices Spectramax M5 microplate reader. X-ray diffraction (XRD)  
45 was performed on a PANalytical B.V. Empyrean with  $\text{CuK}\alpha$  radiation at room  
46 temperature. The scanning electron microscope (SEM) images were obtained using a  
47 Zeiss Merlin Field Emission Scanning Electron Microscope (ZEISS MERLIN FE-  
48 SEM) with an accelerating voltage of 5.0 kV. A Zeiss Merlin Field Emission  
49 Scanning Electron Microscope with an Energy Dispersive Spectrometer (EDS)  
50 attachment was used to characterize the surface composition and the elemental  
51 composition of Ag-PBA and PBA. X-ray photoelectron spectroscopy (XPS)  
52 measurements were performed on a Thermo Fisher Scientific K-Alpha with an  $\text{AlK}\alpha$   
53 excitation source (1486.8 eV). EPR spectrum of the Ag-PBA- $\text{H}_2\text{O}_2$ -TMB system was  
54 obtained using a Bruker A300 Electron Paramagnetic Resonance (EPR) spectrometer.  
55 The following EPR conditions were used: central magnetic field (CF), 3500.00 G;  
56 scanning width (SW), 150.00 G; scanning time (ST), 30.00 s; microwave power (MP),  
57 3.99 mW; modulation amplitude (MA), 1.000 G; transfer time, 40.0 ms.

### 58 **Optimization of the $\text{Ag}^+$ concentration added in the process of the synthesis of** 59 **Ag-PBA**

60 First, PBA was synthesized and then dissolved in 3 mL ethylene glycol. After  
61 dissolution, 10 mL of different concentrations of  $\text{AgNO}_3$  (0.5, 1.0, 1.5, 2.0, 2.5, 3.0  
62 mmol/L) was added slowly, dropwise, under stirring, at room temperature for 3 h. The  
63 stirred solution was centrifuged at 9500 rpm for 8 min and washed with water and  
64 ethanol twice, respectively. The precipitate was dried, weighed, and dissolved in 3 mL  
65 ethylene glycol to obtain the Ag-PBA solution. Subsequently, 15  $\mu\text{L}$  Ag-PBA

66 containing different Ag<sup>+</sup> concentrations, 50 μL TMB (20 mmol/L), 50 μL H<sub>2</sub>O<sub>2</sub> (50  
67 mmol/L), and 1 mL phosphate buffer (pH 5.0) were mixed. The absorbance spectrum  
68 of the resulting solution was measured at 650 nm at 25 °C for 10 min. The absorbance  
69 values of the solutions were compared.

## 70 **Stability of Ag-PBA and PBA**

### 71 **(1) Acid resistance of the peroxidase-like activity of Ag-PBA and PBA**

72 First, 15 μL Ag-PBA (57.0 mg/mL) or PBA (56.7 mg/mL), 50 μL TMB (20  
73 mmol/L), 50 μL H<sub>2</sub>O<sub>2</sub> (50 mmol/L), and 1 mL phosphate buffer with different pH  
74 values (pH 3.0, 4.0, 5.0, 6.0, 7.0, 8.0, 9.0) were mixed. The absorbance spectrum of  
75 the resulting solution was measured at 650 nm after incubation at 25 °C for 10 min.

### 76 **(2) Thermal stability of the peroxidase-like activity of Ag-PBA and PBA**

77 Ag-PBA (57.0 mg/mL) or PBA (56.7 mg/mL) was incubated at 10, 20, 30, 40,  
78 and 50 °C for 30 min, added into the reaction solution of 50 μL TMB (20 mmol/L)  
79 and 50 μL H<sub>2</sub>O<sub>2</sub> (50 mmol/L) at 25 °C, and the enzyme activity was measured.

### 80 **(3) Storage stability of the peroxidase-like activity of Ag-PBA and PBA**

81 To measure the stability of Ag-PBA and PBA to storage, Ag-PBA (57.0 mg/mL)  
82 and PBA (56.7 mg/mL) were stored at room temperature. The peroxidase mimetic  
83 activity of Ag-PBA and PBA was measured once per day for 4 weeks.

### 84 **(4) Reusability of the peroxidase-like activity of Ag-PBA and PBA**

85 The reusability of Ag-PBA and PBA was evaluated by assay of the peroxidase-  
86 like activity. After each reaction, Ag-PBA or PBA was recovered, washed with

87 deionized water, and then placed into a new reaction system to measure the  
88 peroxidase-like activity.

### 89 **Optimization of the reaction conditions for the Ag-PBA method**

#### 90 **(1) Optimization the reaction temperature**

91 15  $\mu\text{L}$  Ag-PBA (57.0 mg/mL), 50  $\mu\text{L}$   $\text{H}_2\text{O}_2$  (50 mmol/L), 50  $\mu\text{L}$  TMB (20  
92 mmol/L), and 1 mL phosphate buffer (pH 5.0) were mixed into a 1.5 mL centrifuge  
93 tube. Then, the reaction was performed at 0, 5, 15, 20, 25, 30, 35, 40, 45, and 50  $^\circ\text{C}$   
94 for 10 min to measure the enzyme activity.

#### 95 **(2) Optimization of TMB concentration**

96 15  $\mu\text{L}$  Ag-PBA (57.0 mg/mL), 50  $\mu\text{L}$   $\text{H}_2\text{O}_2$  (50 mmol/L), 1 mL phosphate buffer  
97 (pH 5.0), and different volumes of TMB (20 mmol/L) (5.5, 11, 16.5, 22, 27.5, 33,  
98 38.5, 44, and 49.5  $\mu\text{L}$ ) were mixed into 1.5 mL centrifuge tubes. Each tube was filled  
99 with the deionized water until the total volume in each tube was 1100  $\mu\text{L}$ , producing  
100 final concentrations of TMB, respectively, of 0.1, 0.2, 0.3, 0.4, 0.5, 0.6, 0.7, 0.8, 0.9  
101 mmol/L. The absorbance spectrum of the resulting solution was measured at 650 nm  
102 after incubation at 25  $^\circ\text{C}$  for 10 min.

#### 103 **(3) Optimization of the $\text{H}_2\text{O}_2$ concentration**

104 15  $\mu\text{L}$  Ag-PBA (57.0 mg/mL), TMB (20 mmol/L) with the optimum volume, 1 mL  
105 phosphate buffer (pH 5.0), and different volumes of  $\text{H}_2\text{O}_2$  (50 mmol/L) (10, 15, 20, 25,  
106 30, 35, 40, 45, and 50  $\mu\text{L}$ ) were mixed into a 1.5 mL centrifuge tube. Each tube was  
107 filled with the deionized water until the total volume in each tube was 1100  $\mu\text{L}$ ,  
108 producing final concentrations of  $\text{H}_2\text{O}_2$ , respectively, of 0.45, 0.68, 0.91, 1.14, 1.36,

109 1.59, 1.82, 2.05, 2.27 mmol/L. The absorbance spectrum of the resulting solution was  
110 measured at 650 nm after incubation at 25 °C for 10 min.

#### 111 **(4) Optimization of the reaction time**

112 15 µL Ag-PBA (57.0 mg/mL), 38.5 TMB (20 mmol/L), 40µL H<sub>2</sub>O<sub>2</sub> (50 mmol/L),  
113 and 1 mL phosphate buffer (pH 5.0) were mixed into a 1.5 mL centrifuge tube. Then,  
114 the centrifuge tube was filled with the deionized water until the total volume in the  
115 tube was 1100 µL. The absorbance was measured at 650 nm at 25 °C once a minute  
116 for 20 min.

#### 117 **Potential Interference with the Ag-PBA method**

##### 118 **(1) Interference of reducing substances with the Ag-PBA method**

119 15 µL Ag-PBA (57 mg/mL), 38.5 µL TMB (20 mmol/L), and 40 µL H<sub>2</sub>O<sub>2</sub> (50  
120 mmol/L) were mixed into a 1.5 mL centrifuge tube. Then, the centrifuge tube was  
121 filled with phosphate buffer (pH 5.0) until the total volume in the tube was 1100 µL;  
122 this was named group 1.

123 15 µL Ag-PBA (57 mg/mL), 38.5 µL TMB (20 mmol/L), 40 µL H<sub>2</sub>O<sub>2</sub> (50  
124 mmol/L), and 20 µL FeSO<sub>4</sub> (50 mmol/L) were mixed into a 1.5 mL centrifuge tube.  
125 Then, the centrifuge tube was filled with phosphate buffer (pH 5.0) until the total  
126 volume in the tube was 1100 µL; this was named group 2.

127 15 µL Ag-PBA (57 mg/mL), 38.5 µL TMB (20 mmol/L), 40 µL H<sub>2</sub>O<sub>2</sub> (50  
128 mmol/L), and 60 µL ascorbic acid (90 mmol/L) were mixed into a 1.5 mL centrifuge  
129 tube. Then, the centrifuge tube was filled with phosphate buffer (pH 5.0) until the  
130 total volume in the tube was 1100 µL; this was named group 3.

131 The absorbance of each of three groups was measured at 650 nm after the  
132 solution was incubated at 25 °C for 10 min. The absorbance values of the three groups  
133 were compared.

134 **(2) Interference of Ag<sup>+</sup> dissolution in the phosphate buffer solution with the Ag-**  
135 **PBA method**

136 K<sub>2</sub>CrO<sub>4</sub> powder was added to the phosphate buffer solution (pH 5.0) until the  
137 concentration of K<sub>2</sub>CrO<sub>4</sub> reached 1 mol/L. Then, 5 mL phosphate buffer (pH 5.0)  
138 containing 1 mol/L K<sub>2</sub>CrO<sub>4</sub> was added to a 50 mL beaker, and one drop of AgNO<sub>3</sub>  
139 solution at different concentrations was added, in order, to determine the  
140 concentration at which Ag<sup>+</sup> formed a precipitate.

141 Then, fresh Ag-PBA was prepared, and 60 mg Ag-PBA powder was added into 5  
142 mL phosphate buffer solution (pH 5.0) containing 1 mol/L K<sub>2</sub>CrO<sub>4</sub>. The solution was  
143 left to stand for 1 h and observed to see whether brick-red precipitate formed.

144

145

146

147

148

149

150

151

152

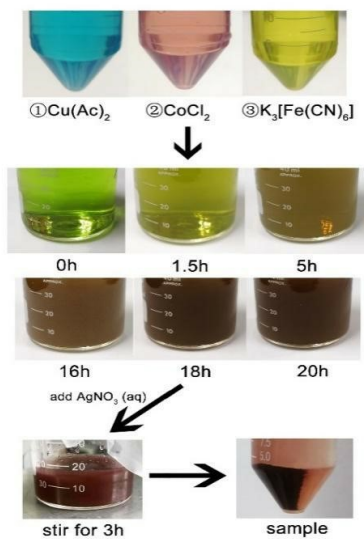

153

154 **Figure S1.** Color changes in the solution during the synthesis of Ag-PBA.

155

156

157

158

159

160

161

162

163

164

165

166

167

168



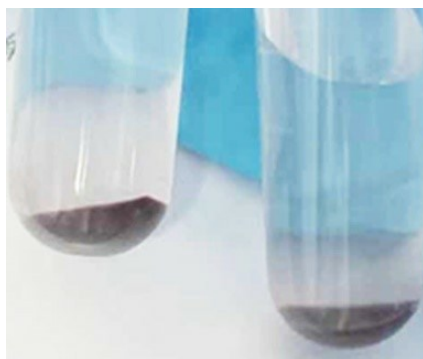

169

170

**Figure S2.** Photographs of Ag-PBA.

171

172

173

174

175

176

177

178

179

180

181

182

183

184

185

186

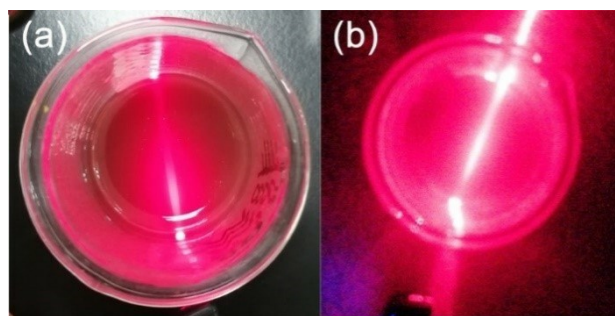

187

188 **Figure S3.** Images of the Tyndall effect on the solution (a) in a bright environment (b)

189

in the dark.

190

191

192

193

194

195

196

197

198

199

200

201

202

203

204

205

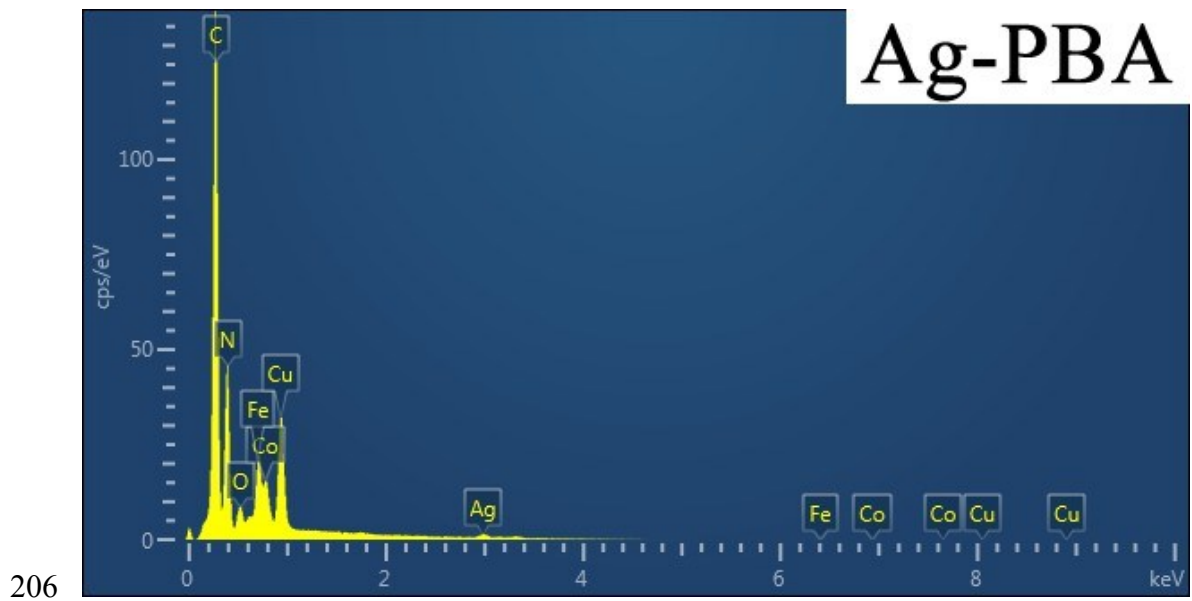

206

207

Figure S4. EDS spectrum of Ag-PBA.

208

209

210

211

212

213

214

215

216

217

218

219

220

221

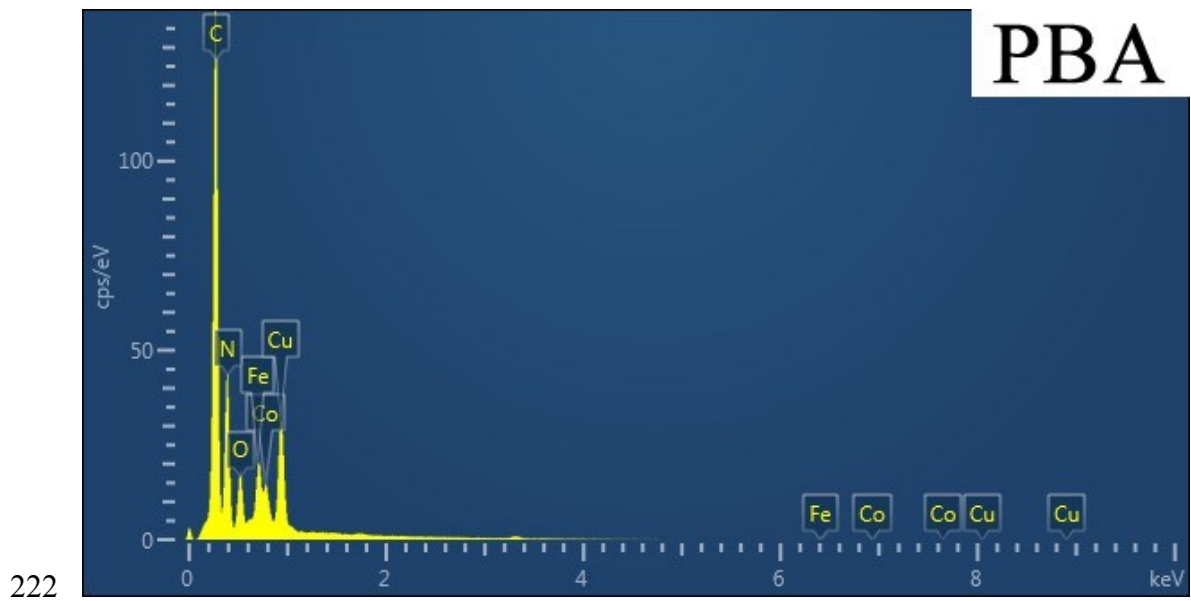

222

223

Figure S5. EDS spectrum of PBA.

224

225

226

227

228

229

230

231

232

233

234

235

236

237

**Table S1.** Elemental composition of PBA from the EDS spectrum

| Element | Wt%   | Wt% $\sigma$ | At%   |
|---------|-------|--------------|-------|
| C       | 33.78 | 0.27         | 54.99 |
| N       | 18.09 | 0.21         | 25.26 |
| O       | 4.28  | 0.09         | 5.23  |
| Fe      | 18.60 | 0.41         | 6.51  |
| Co      | 9.41  | 0.35         | 3.12  |
| Cu      | 15.84 | 0.20         | 4.87  |

239

240

241

242

243

244

245

246

247

248

249

250

251

252

253

254

**Table S2.** Elemental composition of Ag-PBA from the EDS spectrum

| Element | Wt%   | Wt% $\sigma$ | At%   |
|---------|-------|--------------|-------|
| C       | 30.72 | 0.30         | 54.51 |
| N       | 17.45 | 0.23         | 26.55 |
| O       | 1.40  | 0.07         | 1.87  |
| Fe      | 18.60 | 0.42         | 7.10  |
| Co      | 9.78  | 0.35         | 3.54  |
| Cu      | 15.09 | 0.21         | 5.06  |
| Ag      | 6.94  | 0.53         | 1.37  |

256

257

258

259

260

261

262

263

264

265

266

267

268

269

270

271

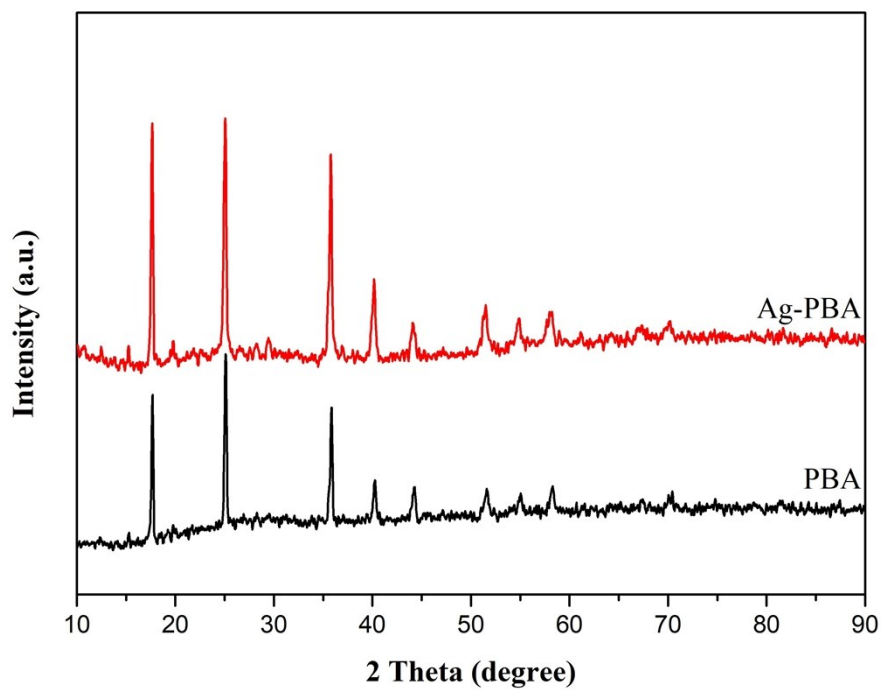

272

273

274

275

276

277

278

279

280

281

282

283

284

285

286

287

288

289

Figure S6. XRD patterns of Ag-PBA and PBA.

290 **Table S3.** Absorbance of the sample solutions measured by the Ag-PBA method and  
 291 the DPPH method

| Sample solution | Method | A <sub>1</sub> | A <sub>2</sub> | A <sub>3</sub> | A <sub>4</sub> | A <sub>5</sub> | Average value | RAD% | Concentration (mg/mL) |
|-----------------|--------|----------------|----------------|----------------|----------------|----------------|---------------|------|-----------------------|
| 1               | Ag-PBA | 0.164          | 0.182          | 0.153          | 0.168          | 0.164          | 0.166         | 2.4  | 13.72                 |
|                 | DPPH   | 0.671          | 0.664          | 0.687          | 0.665          | 0.679          | 0.673         | 1.2  | 13.96                 |
| 2               | Ag-PBA | 0.351          | 0.342          | 0.347          | 0.364          | 0.368          | 0.354         | 2.6  | 11.17                 |
|                 | DPPH   | 0.914          | 0.892          | 0.928          | 0.945          | 0.901          | 0.916         | 1.8  | 10.97                 |
| 3               | Ag-PBA | 0.628          | 0.635          | 0.611          | 0.624          | 0.619          | 0.623         | 1.2  | 7.40                  |
|                 | DPPH   | 1.206          | 1.215          | 1.237          | 1.227          | 1.222          | 1.221         | 0.8  | 7.21                  |
| 4               | Ag-PBA | 0.780          | 0.812          | 0.798          | 0.801          | 0.786          | 0.795         | 1.3  | 5.02                  |
|                 | DPPH   | 1.405          | 1.417          | 1.436          | 1.392          | 1.388          | 1.408         | 1.1  | 4.91                  |
| 5               | Ag-PBA | 1.022          | 1.012          | 1.045          | 1.025          | 1.013          | 1.023         | 0.9  | 1.86                  |
|                 | DPPH   | 1.658          | 1.677          | 1.662          | 1.682          | 1.671          | 1.670         | 0.5  | 1.69                  |

292 RAD, relative average deviation

293

294

295

296

297

298

299

300

301



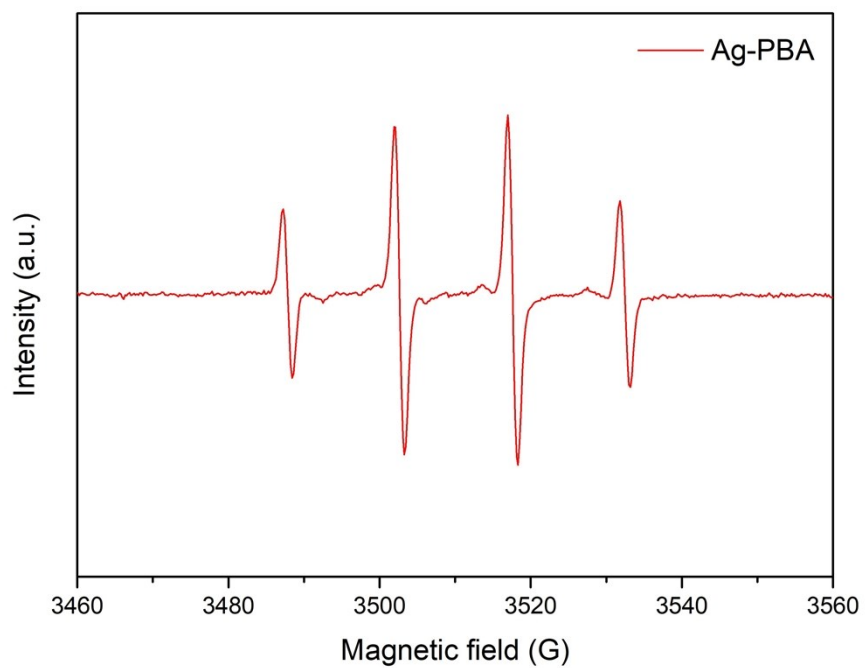

302

303

**Figure S7.** EPR spectrum of the Ag-PBA-H<sub>2</sub>O<sub>2</sub>-TMB system.

304

305

306

307

308

309

310

311

312

313

314

315

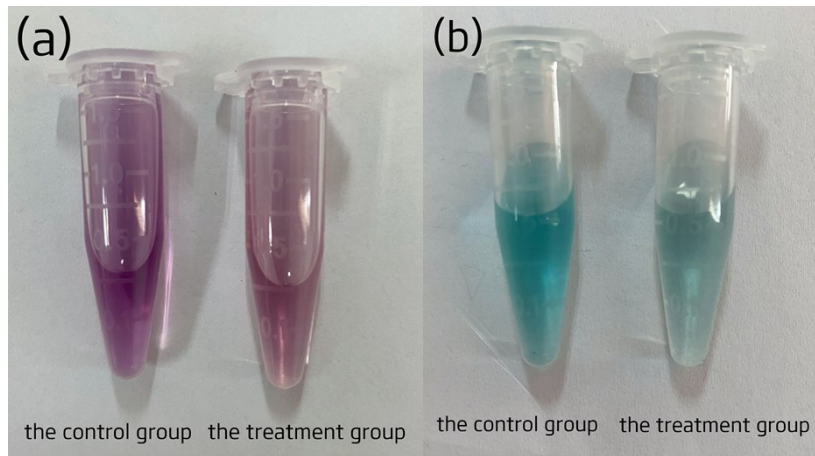

316

317 **Figure S8.** Antioxidant activity of anthocyanidins measured by the DPPH method (a)

318

and the Ag-PBA method (b).

319

320
